# Supplementary material for: Nutritional, Health and Lifestyle Status of a Highly Physically Active and Health-Conscious Long-Term Vegan Man: A Case Report from Slovenia
Source: MDPI journal article supplement (doi:10.3390/reports5040045), 2022-11-03
Supplement: s1 [file s1]

Supplementary materials

# Nutritional, Health and Lifestyle Status of a Highly Physically Active and Health-Conscious Long-Term Vegan Man: A Case Report from Slovenia

Boštjan Jakše <sup>1,\*</sup> and Stanislav Pinter <sup>2</sup>

<sup>1</sup> Independent Researcher, 1230 Domžale, Slovenia

<sup>2</sup> Basics of Movements in Sport, Faculty of Sport, University of Ljubljana, 1000 Ljubljana, Slovenia

\* Correspondence: bj7899@student.uni-lj.si

**Table S1.** Body fat distribution and topographic BMD.

| Parameter | AF<br>(%) | GF<br>(%) | A/G<br>ratio | BMD legs<br>(g/cm <sup>2</sup> ) | BMD pelvis<br>(g/cm <sup>2</sup> ) | BMD spine<br>(g/cm <sup>2</sup> ) | BMD arms<br>(g/cm <sup>2</sup> ) | BMD head<br>(g/cm <sup>2</sup> ) |
|-----------|-----------|-----------|--------------|----------------------------------|------------------------------------|-----------------------------------|----------------------------------|----------------------------------|
| Result    | 11.9      | 15.2      | 0.8          | 1.6                              | 1.25                               | 1.1                               | 1.3                              | 2.6                              |

AF: android fat. GF: gynoid fat. A/G ratio: android/gynoid. BMD: bone mineral density.

**Table S2.** Intake of food groups.

| 7-day DR                            | 1                | 2     | 3     | 4     | 5     | 6     | 7     | Average |
|-------------------------------------|------------------|-------|-------|-------|-------|-------|-------|---------|
| <i>Conventional Food groups (g)</i> |                  |       |       |       |       |       |       |         |
| Grains - all                        | 381              | 523   | 528   | 554   | 447   | 654   | 550   | 520     |
| Grains - oat flakes                 | 200              | 363   | 405   | 216   | 238   | 373   | 165   | 280     |
| Fruits - all                        | 522              | 539   | 523   | 322   | 456   | 614   | 341   | 474     |
| Fruits - berries                    | 95               | 95    | 95    | 125   | 131   | 147   | 111   | 114     |
| Legumes - all <sup>†</sup>          | 165              | 155   | 0     | 256   | 316   | 272   | 133   | 185     |
| Legumes - soy <sup>†</sup>          | 75               | 55    | 0     | 42    | 200   | 25    | 0     | 57      |
| Soy milk                            | 0                | 0     | 500   | 300   | 300   | 500   | 200   | 260     |
| Vegetables - all                    | 390              | 354   | 309   | 339   | 532   | 313   | 238   | 354     |
| Veg. - cruciferous & green leafy    | 230              | 321   | 0     | 156   | 296   | 279   | 172   | 208     |
| Potatoes/tubers                     | 860              | 150   | 508   | 120   | 577   | 0     | 120   | 336     |
| Seeds - all                         | 59               | 59    | 76    | 60    | 66    | 67    | 81    | 67      |
| Seeds - flaxseeds                   | 50               | 50    | 58    | 49    | 48    | 49    | 58    | 52      |
| Nuts - all <sup>††</sup>            | 32 <sup>††</sup> | 63    | 58    | 38    | 62    | 45    | 49    | 50      |
| Nuts - walnuts                      | 30               | 30    | 28    | 38    | 31    | 18    | 28    | 29      |
| Spices/herbs <sup>††</sup>          | 18               | 13    | 21    | 60    | 72    | 40    | 36    | 37      |
| High-fat foods <sup>‡</sup>         | 0                | 12    | 12    | 12    | 21    | 27    | 115   | 28      |
| Mushrooms                           | 0                | 130   | 0     | 0     | 0     | 0     | 0     | 19      |
| Iodized salt                        | 4.1              | 4.1   | 2.7   | 4.6   | 4.1   | 3.4   | 3.9   | 3.8     |
| <i>Supplementations</i>             |                  |       |       |       |       |       |       |         |
| Vegan MR                            | 32               | 64    | 64    | 32    | 64    | 64    | 64    | 55      |
| Vitamin B <sub>12</sub> (1000 µg/d) | 1                | 0     | 0     | 1     | 0     | 0     | 1     | -       |
| Omega-3 (EPA and DHA)               | 0.625            | 0.625 | 0.625 | 0.625 | 0.625 | 0.625 | 0.625 | 0.625   |
| Vitamin D <sub>3</sub> (4000 IU/d)  | 1                | 1     | 1     | 1     | 1     | 1     | 1     | 1       |

---

|                                    |   |   |   |     |     |   |     |     |
|------------------------------------|---|---|---|-----|-----|---|-----|-----|
| Fiber supplements (g/d)            | 5 | 5 | 5 | 5   | 5   | 5 | 5   | 5   |
| Multivitamins (tablets/d)          | 1 | 1 | 1 | 1   | 1   | 1 | 1   | 1   |
| Herbal tea (dL) <sup>†</sup>       | 8 | 8 | 8 | 8   | 8   | 8 | 8   | 8   |
| Sport drink (portion) <sup>‡</sup> | 1 | 0 | 0 | 0.5 | 0.5 | 0 | 0.5 | 0.5 |

---

<sup>†</sup>Soy milk excluded. <sup>‡</sup>Brazil nut (2 g). <sup>‡</sup>E.g., low-fat cocoa powder or avocado. <sup>‡</sup>Dry and raw. <sup>†</sup>Filter and as tea extract. <sup>‡</sup>Portion size (27 g).

**Table S3.** Example of meal plan and lifestyle.

| Meal plan and lifestyle          | WEEKDAY                                                                                                                                                                                                                                                                                                                                           | Meal plan and lifestyle       | WEEKEND                                                                                                                                                                                                                                                                                                                       |
|----------------------------------|---------------------------------------------------------------------------------------------------------------------------------------------------------------------------------------------------------------------------------------------------------------------------------------------------------------------------------------------------|-------------------------------|-------------------------------------------------------------------------------------------------------------------------------------------------------------------------------------------------------------------------------------------------------------------------------------------------------------------------------|
| Wake up (5:00)                   | 4000 IU vitamin D3<br>1.7 g herbal tea extracts                                                                                                                                                                                                                                                                                                   | Wake up (7:20)                | 4000 IU vitamin D3<br>1.7 g herbal tea extracts                                                                                                                                                                                                                                                                               |
| BREAKFAST (6:00)                 | <i>Shake mix</i><br>water + 32 g MR + 197 g oat flakes + 48 g flaxseeds + 11 g unshelled sesame seeds + 9 g paddy millet + 62 g blueberries + 42 g raspberries + 39 g dates + 2 g brasil nut + herbs/spices (2.7 g curcumin + 0.7 g ginger + 0.9 g cinnamon + 0.3 g cayenne pepper)<br>1 tbl multivitamin, 625 mg EPA + DHA + 1000 µg vitamin B12 | BREAKFAST (7:40)              | <i>Shake mix</i><br>water + 32 g MR + 155 g oat flakes + 48 g flaxseeds + 13 g unshelled sesame seeds + 10 g paddy millet + 56 g blueberries, 44 g strawberries + 39 g dates + 2 g brasil nut + herbs/spices (2.7 g curcumin + 0.7 g ginger + 0.9 g cinnamon + 0.3 g cayenne pepper)<br>1 tbl multivitamin + 625 mg EPA + DHA |
| Hydration (7:00, 9:00)           | 2dL thyme and 3 dL peppermint tea                                                                                                                                                                                                                                                                                                                 | Hydration (10:00)             | 2 dL thyme and 3 dL peppermint tea                                                                                                                                                                                                                                                                                            |
| MORNING SNACK (10:00)            | <i>Pasta with lentil</i><br>170 g raw wheat whole grain pasta + 110 g raw red lentil + 95 g raw broccoli + 20 g soy medallions + herbs/spices (0.6 g curcumin + 0.3 g cayenne pepper + 0.3 g basil + 0.3 g chili + 10 g parsley) + 2 g nori algae + 2 g iodized salt                                                                              | Uphill hiking (10:00-12:00)   | i.e., 400 m differences in altitude<br>average speed 5.9 km/h                                                                                                                                                                                                                                                                 |
| Hydration (10:30, 12:30)         | 2 dL thyme and 3 dL peppermint<br>1.7 g herbal tea extracts                                                                                                                                                                                                                                                                                       | Hydration (12:00, 14:00)      | 2 dL thyme and 3dL peppermint<br>1.7 g herbal tea                                                                                                                                                                                                                                                                             |
| BEFORE WORKOUT MEAL (14:30)      | <i>"Brownie"</i><br>152 g raw beans + 42 g apple + 37 g dried dates + 20 g raw oat flakes + 18 g raw raspberries<br>12 g low-fat cocoa powder + 0.2 dL unsweetened soy milk<br>14 g sport drink + 3 dL water                                                                                                                                      | LATE (RECOVERY) SNACK (12:15) | <i>Mixed salad</i><br>75 g potatoes + 70 g endive + 80 g broccoli + 60 g tofu + 65 g tomato + 30 g walnut + 10 g red onion + 15 g vinegar + 2.1 g iodized salt<br><i>pancakes</i><br>105 g spelt whole-grain flour + 75 g dates + 190 g apple + 12 g low-fat cocoa powder + 0.5 g iodized salt                                |
| Resistance workout (16:00-17:00) | free weight, own body weight, stretching                                                                                                                                                                                                                                                                                                          | Hydration (16:00)             | Herbal tea                                                                                                                                                                                                                                                                                                                    |
| AFTER WORKOUT MEAL (17:15)       | <i>Shake</i><br>water + 32 g MR                                                                                                                                                                                                                                                                                                                   | LATE LUNCH (16.50)            | <i>Buckwheat porridge with mushrooms</i>                                                                                                                                                                                                                                                                                      |

|                                                                                                                                                                                                                              |                                                                                                                                                                                                  |                                                                                                                                                                                                                                                    |                  |
|------------------------------------------------------------------------------------------------------------------------------------------------------------------------------------------------------------------------------|--------------------------------------------------------------------------------------------------------------------------------------------------------------------------------------------------|----------------------------------------------------------------------------------------------------------------------------------------------------------------------------------------------------------------------------------------------------|------------------|
| <i>Mixed salad</i>                                                                                                                                                                                                           |                                                                                                                                                                                                  | 170 g buckwheat + 130 g mushroom + 100 g peas + 60 g soya tofu + 33 g non-oiled and non-salted raw peanut + 10 g red onion + 2 g nori algae + herbs/spices (1.2 g curcumin + 0.4 g cayenne pepper + 0.1 g chili + 10 g parsley) + 2 g iodized salt |                  |
| 860 g raw potatoes + 65 g endive + 75 g raw broccoli + 100 g tofu (55 g roasted) + 70 g tomato + 30 g walnut + 5 g red onion + herbs/spices (0.9 g curcumin + 0.2 g basil + 0.1 g chili) + 20 g vinegar + 2.1 g iodized salt |                                                                                                                                                                                                  | 121 g beetroot salad                                                                                                                                                                                                                               |                  |
| <hr/>                                                                                                                                                                                                                        |                                                                                                                                                                                                  |                                                                                                                                                                                                                                                    |                  |
| DINNER (18:40)                                                                                                                                                                                                               | <i>Broccoli soup with buckwheat porridge</i>                                                                                                                                                     | Hydration (19:00)                                                                                                                                                                                                                                  | 3 dL water       |
|                                                                                                                                                                                                                              | 200 g raw broccoli + 160 g raw buckwheat porridge + 75 g tomato + herbs/spices (5 g red onion + 2 g garlic + 0.8 g rosemary + 10 g parsley, 0.7 g curcumin + 0.3 g cayenne pepper + 0.1 g chili) |                                                                                                                                                                                                                                                    |                  |
| <hr/>                                                                                                                                                                                                                        |                                                                                                                                                                                                  |                                                                                                                                                                                                                                                    |                  |
| Hydration (20:00)                                                                                                                                                                                                            | 3 dL water                                                                                                                                                                                       | DINNER (19:30)                                                                                                                                                                                                                                     | <i>Shake mix</i> |
|                                                                                                                                                                                                                              |                                                                                                                                                                                                  | 32 g MR + 2 dL unsweetened soya milk + 200 g oat flakes + 10 g flaxseeds + 5 g unshelled sesame seeds + 8 g paddy millet                                                                                                                           |                  |
| Sleep (21:30-4:00)                                                                                                                                                                                                           |                                                                                                                                                                                                  | Sleep (21:30-5:50)                                                                                                                                                                                                                                 |                  |
| Energy and macronu-<br>trients (foods only)                                                                                                                                                                                  | Energy: 4338 kcal, CHO: 691 (64%), fiber: 118 g (5%), fat: 90 g (19%), protein: 132 g (12%)                                                                                                      | Energy: 4355 kcal, CHO: 622 (57%), fiber: 135 g (6%), fat: 105 g (22%), protein: 163 g (15%)                                                                                                                                                       |                  |

\*SMR = dietary supplements and (vegan) meal replacement. IU = international units. tbl = tablet. Raw = raw weighted. Cooked = cooked weighted. Breakfast (i.e., shake mix) and mixed salad was prepared raw (except potatoes and tofu (roasted)). Macronutrients content of SMR: MR (32 g): energy: 127 kcal, carbohydrate (CHO): 11 g, fiber: 5.8 g, fat: 3 g, protein: 11 g, EPK + DHK = 6 g, sport drink (14 g): energy: 48 kcal, CHO: 12 g, herbal tea extracts: energy: 6 kcal, CHO: 1.5 g. Habitual PA (e.g., housework) in low, moderate or vigorous-intensity are not included in the table.
